1 Transposon insertional mutagenesis in *Saccharomyces uvarum* reveals *trans*-acting effects  
2 influencing species-dependent essential genes

3

4 **Running Title**

5 Gene essentiality is influenced by *trans*-effects

6

7 **Authors**

8 Monica R. Sanchez<sup>1,2</sup>, Celia Payen<sup>1</sup>, Frances Cheong<sup>1</sup>, Blake T. Hovde<sup>1</sup>, Sarah Bissonnette<sup>3</sup>,

9 Adam P. Arkin<sup>5</sup>, Jeffrey M. Skerker<sup>5</sup>, Rachel B. Brem<sup>6</sup>, Amy A. Caudy<sup>4</sup> and Maitreya J. Dunham<sup>1</sup>

10

11 **Affiliations**

12 <sup>1</sup>Department of Genome Sciences, University of Washington, Seattle, Washington, United

13 States of America

14 <sup>2</sup>Molecular and Cellular Biology Program, University of Washington, Seattle, Washington,

15 United States of America

16 <sup>3</sup>Department of Biological Sciences, California State University, Turlock, California, United States

17 of America

18 <sup>4</sup>Donnelly Centre for Cellular and Biomolecular Research, University of Toronto, Toronto, ON,

19 Canada

1 <sup>5</sup>Energy Biosciences Institute, University of California Berkeley, Berkeley, California United

2 States of America

3 <sup>6</sup>Molecular and Cellular Biology, University of California Berkeley, Berkeley, California, United

4 States of America

5

6 \* Corresponding author

7 Email: maitreya@uw.edu (MD)

8

## 1 **Abstract**

2           To understand how complex genetic networks perform and regulate diverse cellular  
3 processes, the function of each individual component must be defined. Comprehensive  
4 phenotypic studies of mutant alleles have been successful in model organisms in determining  
5 what processes depend on the normal function of a gene. These results are often ported to  
6 newly sequenced genomes by using sequence homology. However, sequence similarity does  
7 not always mean identical function or phenotype, suggesting that new methods are required to  
8 functionally annotate newly sequenced species. We have implemented comparative analysis  
9 by high-throughput experimental testing of gene dispensability in *Saccharomyces uvarum*, a  
10 sister species of *S. cerevisiae*. We created haploid and heterozygous diploid Tn7 insertional  
11 mutagenesis libraries in *S. uvarum* to identify species dependent essential genes, with the goal  
12 of detecting genes with divergent functions and/or different genetic interactions.  
13 Comprehensive gene dispensability comparisons with *S. cerevisiae* predicted diverged  
14 dispensability at 12% of conserved orthologs, and validation experiments confirmed 22  
15 differentially essential genes. Surprisingly, despite their differences in essentiality, these genes  
16 were capable of cross-species complementation, demonstrating that *trans*-acting factors that  
17 are background-dependent contribute to differential gene essentiality. This study demonstrates  
18 that direct experimental testing of gene disruption phenotypes across species can inform  
19 comparative genomic analyses and improve gene annotation. Our method can be widely  
20 applied in microorganisms to further our understanding of genome evolution.

1 **Keywords**

2 Functional genomics, yeast, insertional mutagenesis, essential genes, orthologous genes

## 1 Introduction

2           The ability to accurately predict gene function based on DNA sequence similarity is a  
3 valuable tool, especially in the current stage of genomic research where an increasing number  
4 of genomes are being sequenced. It has become crucially important to predict gene function  
5 based on sequence similarity due to the lack of experimentally determined functional  
6 information associated with each newly sequenced genome. Most functional predictive  
7 methods rely on similarities of DNA sequence homology, co-expression patterns, or protein  
8 structure to help assign function to uncharacterized genes, using genes where known functions  
9 have been previously characterized (Eisen 1998; Usadel et al. 2009). However, these methods  
10 come with their own set of limitations and often produce a substantial number of predictive  
11 errors, highlighting the importance of implementing experimental methods to directly test gene  
12 function in previously uncharacterized genomes to improve current methods of annotation.

13           The gold standard of gene function characterization relies on observing phenotypes of  
14 targeted deletions of predicted coding sequences to probe the contributions of each gene to  
15 specific biological processes. To get a global view of gene function within an organism, several  
16 genome-wide deletion collections have been created in model species, particularly in bacteria  
17 and yeast (Baba et al. 2006; Berardinis et al. 2008; Porwollik et al. 2014; Winzeler et al. 1999),  
18 including highly diverged species (Kim et al. 2010; Schwarzmüller et al. 2014) as well as  
19 different strains within a species (Dowell et al. 2010). These systematic deletion collections are  
20 powerful tools for investigating gene function, biological pathways, and genetic interactions,  
21 especially in the genetic workhorse *Saccharomyces cerevisiae*, where gene function  
22 characterization and gene dispensability comparisons have been extensively performed

1 amongst various deletion collections of yeast (Costanzo 2016; Dowell et al. 2010; Kim et al.  
2 2010; Tong et al. 2001). These studies have identified approximately 17% of essential genes to  
3 be differentially essential between highly diverged species (*S. cerevisiae* and  
4 *Schizosaccharomyces pombe*) and have discovered 6% of essential genes (57) that are  
5 differentially essential even between two strains of *S. cerevisiae*.

6         However, considerable effort and resources are required to create these targeted,  
7 systematic libraries, and they are not a practical approach for interrogating a wide range of  
8 non-standard genetic backgrounds in a high-throughput manner. Alternative approaches to  
9 targeted gene deletion libraries are transposon-based mutagenesis methods used to create  
10 random insertional mutant collections, eliminating requirements for *a priori* knowledge about  
11 defined coding regions and providing information about partial loss-of-function or gain-of-  
12 function mutations. Random insertional profiling has been widely applied across various  
13 species and has been instrumental in understanding virulence genes, stress tolerance  
14 mechanisms, and even tumor suppressor genes in mice (DeNicola et al. 2015; van Opijnen and  
15 Camilli 2013; de la Rosa et al. 2017; Weerdenburg et al. 2015; Yung et al. 2015; Coradetti et al.  
16 2018). In yeasts in particular, transposon libraries have provided useful information about gene  
17 function, growth inhibiting compounds, and essential functional protein domains (Gangadharan  
18 et al. 2010; Guo et al. 2013b; Michel et al. 2017; Oh et al. 2010; Ross-Macdonald et al. 1999;  
19 Zhao et al. 2017; Price et al. 2018; Zhu et al. 2018).

20         Despite this growing body of literature, the genetic mechanisms explaining differences  
21 across species are still poorly understood. Here we utilize a random insertional method to assay  
22 gene dispensability using ~50,000 mutants in *Saccharomyces uvarum*, a species that diverged

1 from *S. cerevisiae* 20 million years ago and whose coding sequences are ~20% divergent from  
2 those of *S. cerevisiae* (Dujon 2010; Kellis et al. 2003; Scannell et al. 2007). These species can  
3 mate with one another to create hybrids, allowing us to explore the genetic basis for possible  
4 differential gene dispensability between them using genetic toolsets established in *S. cerevisiae*.  
5 Genes with different dispensability patterns between these two species could be explained by  
6 divergent gene function and/or genetic interactions, providing a model for investigating  
7 genome evolution between two diverged species of yeast. We successfully validate a subset of  
8 predicted differentially essential genes required for growth in rich media, establishing the utility  
9 of our mutagenesis approach in prioritizing genes for testing viability (Michel et al. 2017; Guo et  
10 al. 2013a). In what follows, for genes that emerge from our analyses as differentially essential  
11 between the reference strains of *S. cerevisiae* and *S. uvarum*, we refer to them as species-  
12 specific; rigorously speaking, a comprehensive study across populations will be necessary to  
13 establish whether a given essentiality pattern is truly common to the entirety of the respective  
14 species. Together, our data make clear that our Tn7 transposon mutagenesis library serves as a  
15 valuable resource for studying the *S. uvarum* genome, and that our approach is a powerful  
16 framework for comparative functional genomics studies across newly sequenced, previously  
17 uncharacterized species.

## 1 Results

### 2 Generating Tn7 insertional libraries in *S. uvarum* to predict essential and nonessential genes

3 One of the most straightforward mutant phenotypes to characterize is cell viability,  
4 which reveals if a given gene is involved in an essential cellular process. Therefore, we first  
5 sought to characterize gene essentiality in *S. uvarum*, with the aim of identifying genes that are  
6 differentially essential between *S. cerevisiae* and *S. uvarum*. Instead of creating a library of  
7 individual knock-out strains, we applied a high-throughput approach of creating random  
8 insertional mutants and leveraged the power of sequencing to identify the insertion sites in a  
9 pooled collection. The Tn7 mutagenesis library approach described by Kumar *et al.*, (2004) was  
10 used to create a collection of *S. uvarum* mutant strains and has been previously described by  
11 Caudy *et al.*, (2013). Briefly, *in vitro* transposition of the Tn7 transposon was performed in a  
12 plasmid library containing random *S. uvarum* genomic fragments. The Tn7 transposon was  
13 designed to carry a ClonNat resistance marker that carries stop codons in all reading frames  
14 near both termini. The interrupted genomic fragments were excised out of the plasmid and  
15 integrated at their corresponding genomic positions in the reference strain background of *S.*  
16 *uvarum*, each of which is expected to produce a truncation when inserted within a coding  
17 region (**Figure 1A**). The plasmid library contains ~50,000 unique genomic insertion sites; we  
18 integrated the library into a diploid strain and, separately, a haploid *MATa* strain at 10X  
19 coverage (additional details can be found in **Supplemental Information**). Pools of mutants from  
20 each Tn7 library were grown in liquid nutrient rich media as described in Materials and  
21 Methods. Insertion sites were determined using sequencing methods as described in detail in



- 1 the **Supplemental Information** along with DNA sequencing library preparation protocols
- 2 (**Figure 1C**).

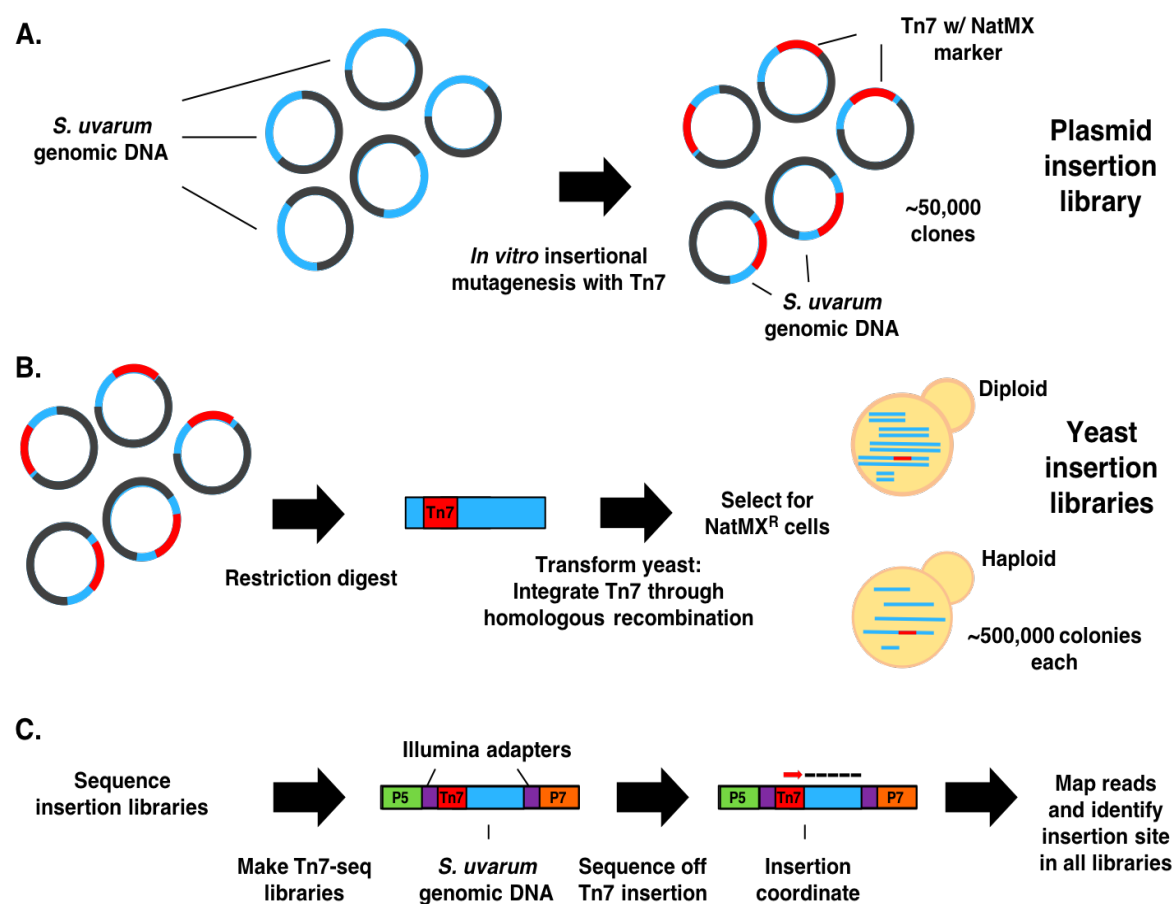

- 3
- 4 **Figure 1. Schematic of Tn7 transposon mutagenesis library and insertion identification in *S.***
- 5 ***uvarum*. A)** Simplified representation of *in vitro* transposition of the Tn7 transposon into a
- 6 plasmid library containing random *S. uvarum* genomic DNA fragments. Approximately 50,000
- 7 plasmids containing the Tn7 transposon were pooled together to form the final library. **B)**
- 8 Illustration of the Tn7 containing excised portion of the plasmid integrated into haploid and
- 9 diploid yeast through homologous recombination. Approximately 500,000 Nat<sup>R</sup> clones of each
- 10 ploidy were pooled into two separate pools (Haploid pool and Diploid pool). **C)** Design of Tn7-
- 11 seq libraries used to identify insertion sites through sequencing. Reads containing Tn7 sequence
- 12 are enriched (PCR off common flanking region of the Tn7 and Illumina adapter sequences) and
- 13 mapped to the genome to identify insertion sites.

1           We catalogued transposon insertion mutants on the basis of sequenced insertion sites  
2 that could be detected after mutagenesis and outgrowth of haploid and diploid *S. uvarum*, and  
3 we also tabulated those mutants present in both pools. We found these insertion sites to be  
4 evenly distributed throughout the *S. uvarum* genome, as illustrated in **Supplemental Fig. 1**.  
5 (Detailed information about overall sequencing coverage is listed in **Supplemental File 4**.) Once  
6 the insertion sites were determined in both libraries, we counted the number of insertion sites  
7 in each annotated open reading frame (Materials and Methods). **Supplemental Table 1**  
8 summarizes the number of insertion sites and the number of genes that contain insertion sites  
9 within each library, including the initial plasmid library. The number of insertion sites from  
10 each library that fell into each annotated *S. uvarum* gene is listed in **Supplemental File 5**. Of  
11 the 5,908 annotated genes, a total of 5,315 (90%) genes harbored insertion sites that were  
12 identified in at least one library. Comparisons between shared genes and unique genes  
13 harboring insertion sites are illustrated in **Supplemental Fig. 2**.

14           Since by definition, loss of function mutants in genes essential in *S. uvarum* would not  
15 be viable in the haploid of this species, we used our observations of detected transposon  
16 mutants in this strain as a jumping-off point for inferences of gene essentiality. We first tested  
17 whether orthologs of the known essential set in *S. cerevisiae* would be depleted for insertion  
18 sites in the *S. uvarum* haploid, as would be predicted if the essentiality of most genes were  
19 conserved between the species. Consistent with this notion, we identified a significant  
20 reduction in the number of inserts present in known *S. cerevisiae* essential genes in the haploid  
21 *S. uvarum* library (Wilcoxon test  $p < 2.2 \times 10^{-16}$ , essential average inserts/kb=0.88, SD=1.28 vs. non-  
22 essential average inserts/kb = 4, SD = 4.38) (**Supplemental Fig. 3**), indicating that essential

1 genes are effectively targeted by this approach. However, due to the nature of the library,  
2 insertional events at different positions across a gene may result in a partial loss-of-function  
3 (Sadhu et al. 2018). Since essential genes may still tolerate some insertions, we instead relied  
4 on comparisons between the diploid and haploid libraries to make inferences about gene  
5 essentiality. Specifically, we calculated an insertion ratio using the number of inserts per gene  
6 in the haploid library divided by the number of inserts in the diploid library, which inherently  
7 normalizes for the length of the gene (Materials and Methods). Using the insertion ratio as a  
8 metric, we tested for significant differences between *S. uvarum* genes whose orthologs were  
9 essential and non-essential in *S. cerevisiae*. In our analyses, we used *S. uvarum* intergenic  
10 regions as a control: intergenic regions between convergently oriented genes are expected to  
11 largely not be essential, and thus we expected the distribution of intergenic regions to be  
12 similar to that of non-essential genes.

13 **Figure 2A** reports the distribution of detected insertion mutants in *S. uvarum* haploids  
14 and diploids (quantified by the insertion ratio) for each feature type. As predicted, we found  
15 that *S. uvarum* orthologs of known *S. cerevisiae* non-essential genes generally behaved similarly  
16 in our mutant pools to *S. uvarum* intergenic regions. Interestingly, however, the distribution of  
17 insertion ratios from these orthologs of non-essential genes had a left shoulder resembling the  
18 distribution among orthologs of *S. cerevisiae* essential genes. We hypothesized that this  
19 population of genes depleted for insertions in *S. uvarum* haploids was likely to reflect *S.*  
20 *uvarum*-specific essential genes. Likewise, we also noted a right-hand tail (corresponding to  
21 highly abundant transposon mutants in *S. uvarum* haploids) in the distribution of insertion  
22 ratios among *S. uvarum* orthologs of *S. cerevisiae* essential genes, suggesting that some were in

1 fact not essential in *S. uvarum*. The differences between orthologs of *S. cerevisiae* essential  
2 genes and non-essential gene insertion ratios were significant, as well the differences between  
3 orthologs of essential genes and intergenic regions (**Figure 2B**, Wilcoxon  $p < 2.2e^{-16}$ ). Using the  
4 insertion ratio, we formulated a prediction of each gene as either essential or non-essential in  
5 *S. uvarum* using a null distribution to rank genes above or below a cut-off metric of 0.25 (details  
6 described in **Supplemental Information**). Using this cut-off value, 1170 genes were categorized  
7 as predicted essential genes. We applied an additional cut-off metric (more details in Material  
8 and Methods) to remove a class of low coverage genes, resulting in a total number of 718 (13%)  
9 predicted essential genes and 3,838 (65%) genes that are predicted non-essential, with 1299  
10 genes (22%) undetermined (genes without inserts in the diploid library). We proceeded to  
11 characterize each gene set and validate the dispensability of each of the predicted gene  
12 categories.  
13

**A.**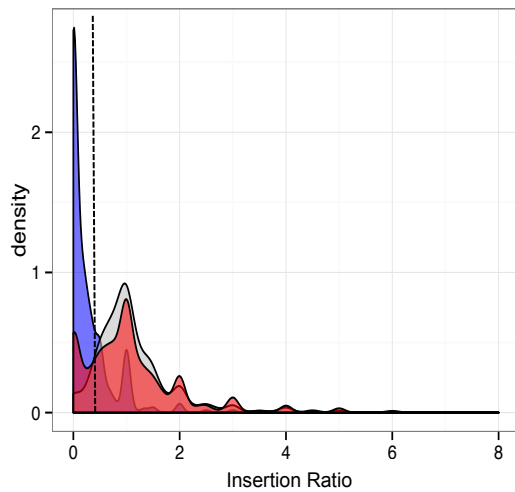**B.**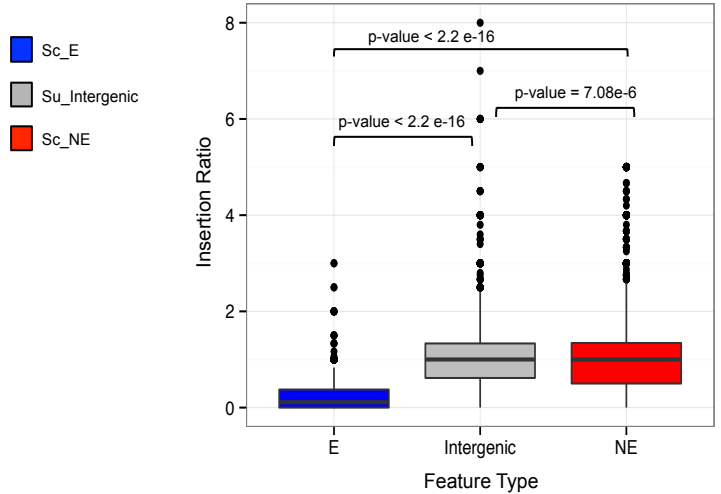

1

2 **Figure 2. Insertion ratio distributions of *S. uvarum* intergenic regions and known *S. cerevisiae***3 **essential and non-essential genes. A)** Density plots displaying the distribution of insertion4 ratios across three feature types: *S. uvarum* intergenic regions between Watson and Crick5 oriented genes ranging from 7 kb-500 bp (grey) and *S. uvarum* genes whose orthologs are6 known *S. cerevisiae* essential (Sc\_E in blue) and nonessential genes (Sc\_NE in red). The dashed

7 line represents an insertion ratio of 0.25 and defines the cut-off value to classify essential and

8 non-essential genes. **B)** Box plots of insertion ratios by feature type described in plot A.9 Significant insertion ratio differences exist between known *S. cerevisiae* essential and non-10 essential genes and between *S. uvarum* intergenic regions. (Wilcoxon tests Sc\_E:Su\_Intergenic11  $p < 2.2e^{-16}$ , Sc\_E:Sc\_NE  $p < 2.2e^{-16}$ , Sc\_NE:Su\_Intergenic  $p = 7.08e^{-6}$ ).

12

13 **Analysis of predicted gene dispensability**14 The predicted gene list of *S. uvarum* essential genes was compared to known essential15 genes lists from both *S. cerevisiae* and *S. pombe* to determine the amount of conservation that16 exists between orthologs across diverged species. Of the predicted 718 *S. uvarum* essential

17 genes, 297 genes (42%) were shared amongst all three sets, with a total of 487 genes (68%)

1 shared with at least one other set. Furthermore, 9 genes whose essentiality was specific to  
2 particular *S. cerevisiae* strains, including 4 genes specific to the S288C strain and 5 genes that  
3 are specific to the  $\Sigma$ 1278b strain, were inferred by our analysis to be essential in *S. uvarum*  
4 **(Supplemental Fig. 4)**. Similar to what has been previously shown in *S. cerevisiae*, predicted  
5 essential genes in *S. uvarum* were more likely to be unique, with 91% of essential genes  
6 (656/718) being present in single copy compared to 76% of non-essential genes (2736/3604).  
7 Additionally, comparisons between Gene Ontology (GO) molecular function terms of essential  
8 gene sets from both species showed significant enrichment ( $p$ -value < 0.01) for fundamental  
9 biological functions. Processes such as DNA replication/binding, RNA and protein biosynthesis,  
10 as well as structural constituents of the ribosome and cytoskeleton were enriched in both  
11 predicted *S. uvarum* essential genes and those known to be essential in *S. cerevisiae*  
12 **(Supplemental File 6)**. In contrast, non-essential genes were significantly ( $p$ -value < 0.01)  
13 enriched for regulatory functions (transcription factor activity) and conditional responsive  
14 processes, such as transmembrane transporter activity and cell signaling (kinase activity)  
15 **(Supplemental File 7)**. We conclude that many of the features of the predicted essential genes  
16 in *S. uvarum* are similar to confirmed essential genes in other species.

17         We next sought to validate experimentally the predictions of essentiality we had made  
18 from our transposon mutagenesis. We first focused on genes whose orthologs were known to  
19 be essential in *S. cerevisiae*, and which we had likewise predicted to be essential in *S. uvarum*.  
20 For each of 13 such cases, we sporulated the respective heterozygous deletion strain and  
21 performed tetrad analysis for cell viability; the results confirmed essentiality for 12 (92%) of the  
22 13 strains **(Supplemental Table 2)**. One example of a confirmed essential gene can be found in

1 **Figure 3A**, which illustrates the genomic positions of all insertion sites across a genomic locus of  
2 chromosome V that contains essential and non-essential genes. The color of the gene outline  
3 reports the predicted dispensability, which is determined by their insertion ratio. For example,  
4 the gene *BRR2*, a RNA-dependent RTPase RNA helicase, had an insertion ratio of 0.130 and was  
5 predicted to be a conserved essential gene (**Figure 3C**). The tetrad analysis of a *BRR2*  
6 heterozygous deletion strain displayed a 2 viable:2 inviable segregation pattern in both *S.*  
7 *cerevisiae* and *S. uvarum*, validating this gene as a conserved essential gene (**Figure 3B**). Images  
8 of all other confirmed essential genes are in **Supplemental Fig. 5**. We also tested three genes  
9 known to be non-essential in *S. cerevisiae* and predicted by our analysis to be non-essential in *S.*  
10 *uvarum*, confirming all three (100%) as non-essential in both species (**Supplemental Fig. 6**)  
11 (**Supplemental Table 2**).

12         Additionally, we obtained an independent set of *S. uvarum* haploid deletion strains (see  
13 Materials and Methods), which was used as a validated non-essential gene set. Out of the total  
14 356 genes that were viable upon deletion in this collection, our analysis of transposon mutants  
15 inferred 346 to be non-essential in *S. uvarum* (97%), providing further strong support to the  
16 predictions from our method.

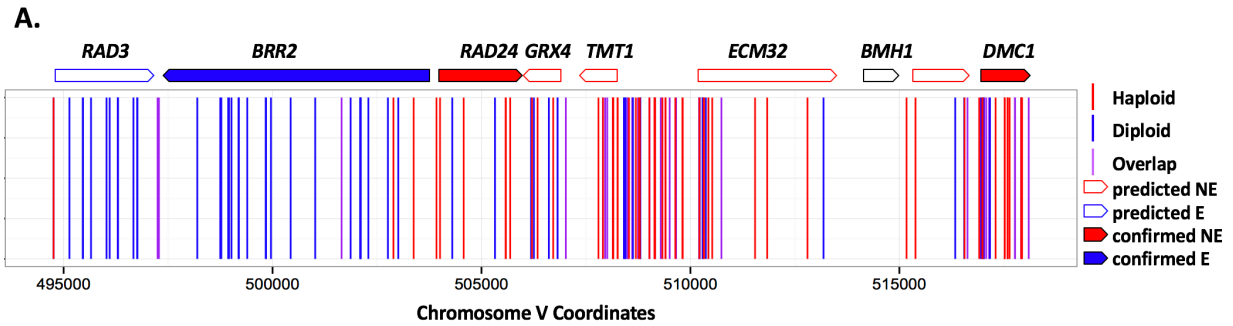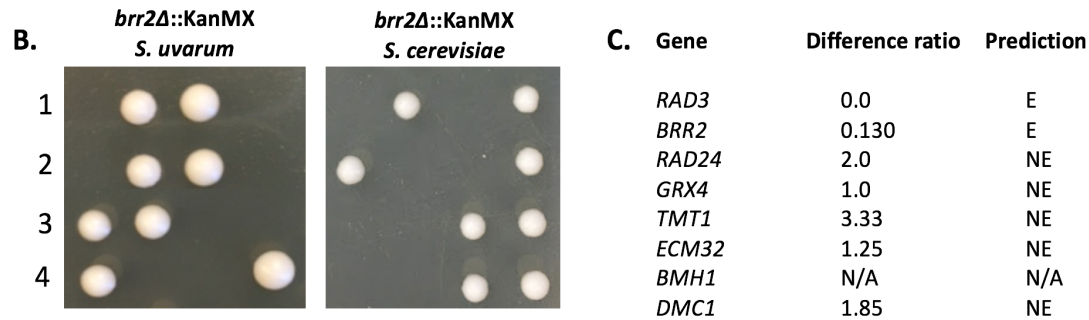

**Figure 3. Validation of conserved essential and non-essential genes.** A) Mapped chromosomal insertion positions are plotted across chromosome V. Haploid inserts are indicated in red, diploid inserts are blue, and overlapping inserts are indicated in purple. Genes indicated across the top are outlined according to predicted dispensability and filled in if confirmed. B) Tetrad analysis of a confirmed conserved essential gene *brr2Δ* in *S. cerevisiae* and *S. uvarum*. Segregants containing *brr2Δ* alleles are inviable in both species. C) Table indicating the insertion ratio (number of haploid inserts by the number of diploid inserts) per gene. The final column lists the predicted classification (NE, non-essential; E, essential; N/A, no data).

### Gene dispensability comparisons of orthologous pairs between *S. cerevisiae* and *S. uvarum*

Our main goal of this project was to identify genes that were differentially essential in a species-dependent manner. To make direct comparisons of dispensability between *S. cerevisiae* and *S. uvarum*, we narrowed our analysis to 4,543 orthologous genes for which we



1 had data in the *S. uvarum* dataset (**Supplemental File 8**). Overall, our predicted patterns of  
2 essentiality in *S. uvarum* were consonant with the known behavior in *S. cerevisiae* for 88%  
3 (4016/4543) of these genes. The remaining 12% of orthologs were predicted to differ in  
4 essentiality between the two species, with 304 (7%) of these genes only essential in *S. uvarum*  
5 and 221 (5%) genes only essential in *S. cerevisiae* (**Supplemental Figure 7A**). We note that the  
6 former could represent an over-estimate of the count of predicted essential genes specific to *S.*  
7 *uvarum*, in that it is inferred from the lack of detected insertion sites in our haploid *S. uvarum*  
8 libraries in genes not previously characterized as essential in *S. cerevisiae*. All predicted genes  
9 that differ in dispensability are listed in **Supplemental File 9**.

10 To analyze further our predictions of differential essentiality between the species, we  
11 compiled a list of 222 genes whose respective orthologs were known to be essential in *S.*  
12 *cerevisiae* and predicted to be non-essential in *S. uvarum*; we also formulated more stringent  
13 cutoffs for our transposon mutant library analysis (see Materials and Methods) to yield a  
14 similarly sized set of genes (220 total) inferred to be essential in *S. uvarum* and known to be  
15 non-essential in *S. cerevisiae*. Using this list, we determined the proportion of inferred *S.*  
16 *cerevisiae*-specific and *S. uvarum*-specific essential genes annotated for each function by  
17 performing Gene Ontology (GO) term finder using the molecular function ontology. Among the  
18 results, reported in **Supplemental Figure 7B**, most striking were enrichments for structural  
19 constituents of the ribosome among genes predicted to be essential only in *S. uvarum*, and for  
20 RNA polymerase activity among genes inferred to be essential only in *S. cerevisiae*. Full lists of  
21 significant ( $p$ -value < 0.01) GO enrichment molecular function terms for each species  
22 individually are listed in **Supplemental File 10**. We also hypothesized that genetic interaction

1 patterns could distinguish genes that were predicted to be differentially essential between *S.*  
2 *cerevisiae* and *S. uvarum*. Toward this end, we tabulated combined interaction degree scores  
3 for all orthologous genes between yeast, worm, flies, mice, and humans. We first compared  
4 interaction degrees between known essential and non-essential genes, and found the former to  
5 be increased, as previously reported (Costanzo 2016) (**Supplemental Fig. 8**). Next, we  
6 formulated a comparison between two gene sets: those predicted to be essential in *S. uvarum*  
7 and known to be non-essential in *S. cerevisiae* on the one hand, and those categorized as non-  
8 essential in both species on the other hand. We found a striking and significant increase in the  
9 number of combined interactions in the former ( $p$ -value =  $1.99 \times 10^{-7}$ ), suggesting that having  
10 more interactions may be predictive of essential function. Analyses of expression could not  
11 account for the differences in essentiality (**Supplemental Figure 13**).

12 We next set out to confirm experimentally a subset of predicted essential genes within  
13 each species, by sporulating heterozygous deletion strains to determine the viability pattern of  
14 the segregants. As an example of a confirmed *S. uvarum*-specific essential gene from these  
15 experiments, *SSQ1*, which is required for assembly of iron/sulfur clusters into proteins, is  
16 illustrated in **Figure 4**. **Figure 5** displays an example of a gene confirmed to be essential in *S.*  
17 *cerevisiae* but not *S. uvarum*: *VTC4*, a gene involved in the regulation of membrane trafficking.  
18 Overall, we confirmed a total of 22 *S. uvarum*-specific and *S. cerevisiae*-specific essential genes  
19 (tetrad analysis can be found in **Supplemental Figs. 9 and 10** respectively). Interestingly, we  
20 found a variety of growth phenotypes associated with deletion in the permissive species  
21 background of confirmed species-specific essential genes, with some deletions showing poor  
22 growth and others growing as well as wt. All combined tetrad analysis results are reported in

1 **Supplemental Fig. 11**; these results include genes for which sporulation experiments did not  
2 validate the inferences of species-specific essentiality from our transposon mutagenesis, which  
3 we refer to as false positives. **Supplemental Table 2** summarizes the total number of genes  
4 confirmed in each category. We note the higher false positive rate in the species-specific  
5 essential gene categories; as above, in part this likely reflects incorrect calls of essentiality in *S.*  
6 *uvarum* in which we detected no transposon mutants in our haploid libraries as a product of  
7 low coverage, rather than inviability of the respective mutants.

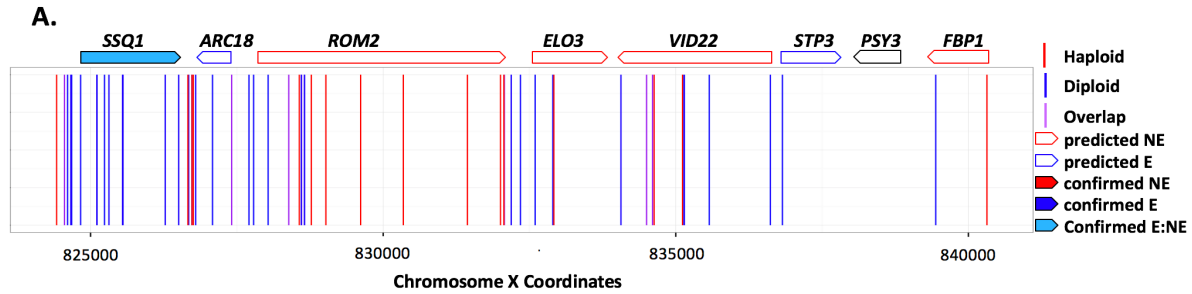

**B.** *ssq1Δ::KanMX*  
*S. uvarum*

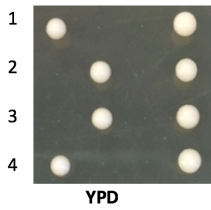

**C.** *ssq1Δ::KanMX*  
*S. cerevisiae*

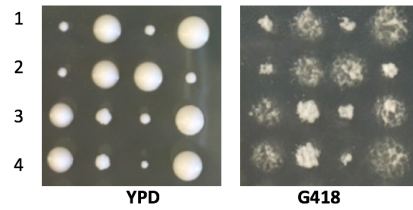

**D.**

| Gene         | Difference Ratio | Prediction |
|--------------|------------------|------------|
| <i>SSQ1</i>  | 0.090            | E          |
| <i>ARC18</i> | 0.0              | E          |
| <i>ROM2</i>  | 1.5              | NE         |
| <i>ELO3</i>  | 0.5              | NE         |
| <i>VID22</i> | 0.66             | NE         |
| <i>SPT3</i>  | 0.0              | E          |
| <i>PSY3</i>  | N/A              | N/A        |
| <i>FBP1</i>  | 0.5              | NE         |

1

2 **Figure 4. Validation of *S. uvarum*-specific essential gene *SSQ1*.** A) Mapped chromosomal

3 insertion positions are plotted across chromosome X. Haploid inserts are indicated in red,

4 diploid inserts are blue and overlapping inserts are indicated in purple. Genes indicated across

5 the top are outlined according to predicted dispensability and filled in, if confirmed. Light blue

6 filling indicates a gene that is essential in *S. uvarum* and non-essential in *S. cerevisiae*

7 (confirmed E\_NE). B) Tetrad analysis of a heterozygous *ssq1Δ::KanMX* strain displaying inviable

8 segregants containing the *ssq1Δ* allele in *S. uvarum*. C) Tetrad analysis of a heterozygous

9 *ssq1Δ::KanMX* strain in *S. cerevisiae* containing viable segregants plated on YPD and G418. D)

10 Table indicating the insertion ratio (number of haploid inserts by the number of diploid inserts)

11 per gene. The final column lists the predicted classification (NE, non-essential; E, essential; N/A,

12 no data).

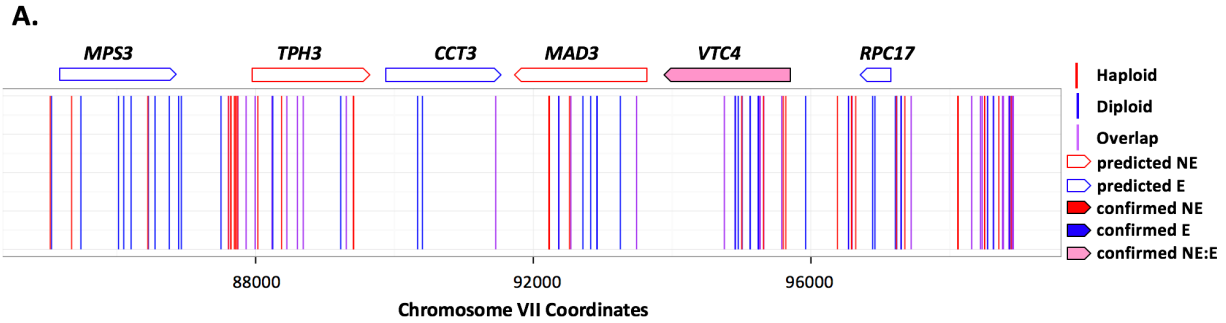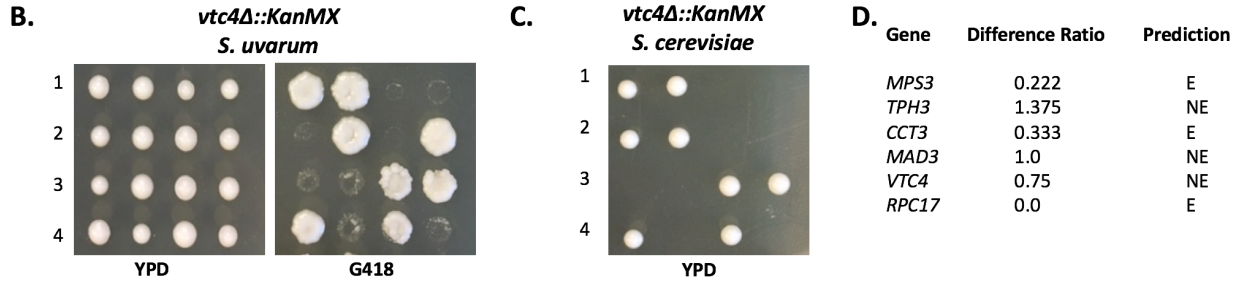

1  
2 **Figure 5. Validation of *S. cerevisiae*-specific essential gene *VTC4*.** A) Mapped chromosomal  
3 insertion positions are plotted across chromosome XII. Haploid inserts are indicated in red,  
4 diploid inserts are blue and overlapping inserts are indicated in purple. Genes indicated across  
5 the top are outlined according to predicted dispensability and filled in if confirmed. Light pink  
6 filling indicates a gene that is essential in *S. cerevisiae* and non-essential in *S. uvarum*  
7 (confirmed NE\_E). B) Tetrad analysis of a heterozygous *vtc4Δ* strain displaying viable  
8 segregants with the *vtc4Δ* allele in *S. uvarum* plated on YPD and G418. C) Tetrad analysis of a  
9 heterozygous *vtc4Δ* allele in *S. cerevisiae* resulting in inviable segregants. D) Table indicating  
10 the insertion ratio (number of haploid inserts by the number of diploid inserts) per gene. The  
11 final column lists the predicted classification (NE, non-essential; E, essential; N/A, no data).

12

13 That said, in some cases, validation failures could be explained by errors in genome  
14 annotation, not errors in our insertional library results. For example, the gene *DRE2*, which  
15 functions in cytosolic iron-sulfur protein biogenesis, was predicted to be a non-essential gene,  
16 but was confirmed as an essential gene through tetrad analysis. Manual inspection revealed  
17 that all the haploid insertions were clustered at the 5' end of the gene (**Supplemental Fig. 12**).

1 In protein alignments of *DRE2* between *S. cerevisiae* and *S. uvarum*, we noted an annotated  
2 start codon in *S. uvarum* upstream of the annotated start codon in *S. cerevisiae*. These data  
3 strongly suggest that the gene was misannotated in *S. uvarum*, and instead shares the  
4 methionine start position further downstream. Using the reannotated gene coordinates, we  
5 would correctly classify *DRE2* as essential in *S. uvarum* since the haploid insertions were no  
6 longer included in the open reading frame. This example highlights the utility of our method to  
7 improve gene annotation in addition to characterizing gene essentiality.

8

## 9 **Paralog divergence and duplicate gene loss explain some background effects on differential** 10 **gene essentiality**

11 We next set out to investigate genetic background effects that could be contributing to  
12 differences in gene dispensability between *S. cerevisiae* and *S. uvarum*. One explanation could  
13 be genetic redundancy due to gene duplications, such that a gene is nonessential in one species  
14 due to the presence of a paralog, whereas the other species contains only a single copy. To  
15 investigate this possibility, we began investigating genes that both differed in dispensability and  
16 harbored a paralog. Of the 222 *S. cerevisiae*-specific essential genes, 11 were known to have  
17 paralogs. Our initial analysis identified the Ras activator *CDC25* as a *S. cerevisiae*-specific  
18 essential gene (nonessential in *S. uvarum*). *CDC25* is a paralog of *SDC25*, which contains a  
19 premature stop codon in the reference strain of *S. cerevisiae* and other laboratory strains  
20 (Folch-Mallol et al. 2004).

21 We performed complementation assays by cloning *S. uvarum* alleles of both paralogs  
22 into a CEN/ARS plasmid and testing whether the *S. uvarum* alleles could rescue the inviable

1 phenotype of segregants from a heterozygous *cdc25Δ* deletion in *S. cerevisiae*. We found that  
2 *SDC25* from *S. uvarum* was functional, and that both *SDC25* and *CDC25* alleles from *S. uvarum*  
3 could complement a *cdc25Δ* deletion in *S. cerevisiae* (**Table 1**). Although we did not test for  
4 complementation in the *S. uvarum* background, the results from the complementation assays  
5 demonstrate that *CDC25* is required for growth in this strain of *S. cerevisiae* due to the lack of  
6 redundancy as a consequence of the non-functional copy of *SDC25*. We expect that this  
7 relationship may be unique to those *S. cerevisiae* strains in which *SDC25* is a pseudogene, but  
8 we nonetheless consider it a satisfying validated mechanism for the background dependence of  
9 *CDC25* essentiality.

10         Following this same logic, we hypothesized that *CDC25* non-essentiality in *S. uvarum*  
11 could be attributed to the redundancy provided by the functional copy of *SDC25* in this species.  
12 To test this idea, we created an *S. uvarum* mutant heterozygous for both *cdc25Δ* and *sdc25Δ*  
13 and performed segregation analysis on the dissected tetrads (**Table 1**). Unexpectedly, the  
14 segregation pattern of a double mutant displayed a lethal phenotype for not only the double  
15 mutant but also the single *sdc25Δ* mutant. We confirmed this result by constructing an *sdc25Δ*  
16 heterozygous mutant in *S. uvarum* and found a 2:2 segregation pattern showing that *SDC25* is  
17 an essential gene in *S. uvarum*. We conclude that, of the two paralogs, one is essential in our *S.*  
18 *cerevisiae* strain and the other in *S. uvarum*, representing a novel case of a swap in essentiality.

| Genotype                | <i>S. cerevisiae</i> | <i>S. uvarum</i> |
|-------------------------|----------------------|------------------|
| <i>cdc25Δ</i>           | -                    | +                |
| <i>sdc25Δ</i>           | +                    | -                |
| <i>cdc25Δ + ScCDC25</i> | +                    | N/D              |
| <i>cdc25Δ + SuCDC25</i> | +                    | N/D              |
| <i>cdc25Δ + SuSDC25</i> | +                    | N/D              |
| <i>cdc25Δ + ScSDC25</i> | -                    | N/D              |
| <i>sdc25Δ + ScCDC25</i> | N/D                  | -                |

1

2 **Table 1. Viability summary of gene deletions and complementation assays.** Signs in columns  
3 indicated by each species represent viability (-:inviability, +:viable, N/D: not done).  
4 Complementation assays are represented by the gene deletion with the addition of each gene  
5 expressed on a low copy plasmid.

6

7 **Divergent gene dispensability is largely due to *trans* effects**

8 While genetic redundancy or gene loss is a possible explanation for a fraction of  
9 differentially essential genes, the remaining much larger portion of this class of genes remained  
10 unexplained. Another hypothesis to explain differences in essentiality is gene function  
11 divergence between these two species. We therefore proceeded to further investigate the  
12 remaining differentially essential genes for functional differences. For a subset of these genes,  
13 we performed complementation assays in both species to test for divergent function. We  
14 cloned five *S. cerevisiae* alleles and their promoters from the list of *S. uvarum*-specific essential  
15 genes (*SAC3*, *TUP1*, *CCM1*, *SSQ1*, and *AFT1*) and seven *S. uvarum* alleles from the list of *S.*  
16 *cerevisiae*-specific essential genes (*ALR1*, *SHR3*, *CDC25*, *INN1*, *LCD1*, *SEC24*, *VTC24*) and tested  
17 each allele's ability to rescue the inviability caused by deletion of the corresponding ortholog in



1 the alternate species (**Figure 6**). The results from these complementation tests revealed that all  
2 genes are able to complement the inviable phenotype in the other species, suggesting that the  
3 differences in essentiality are more likely to be due to *trans*-acting changes rather than  
4 functional differences of protein-coding regions.

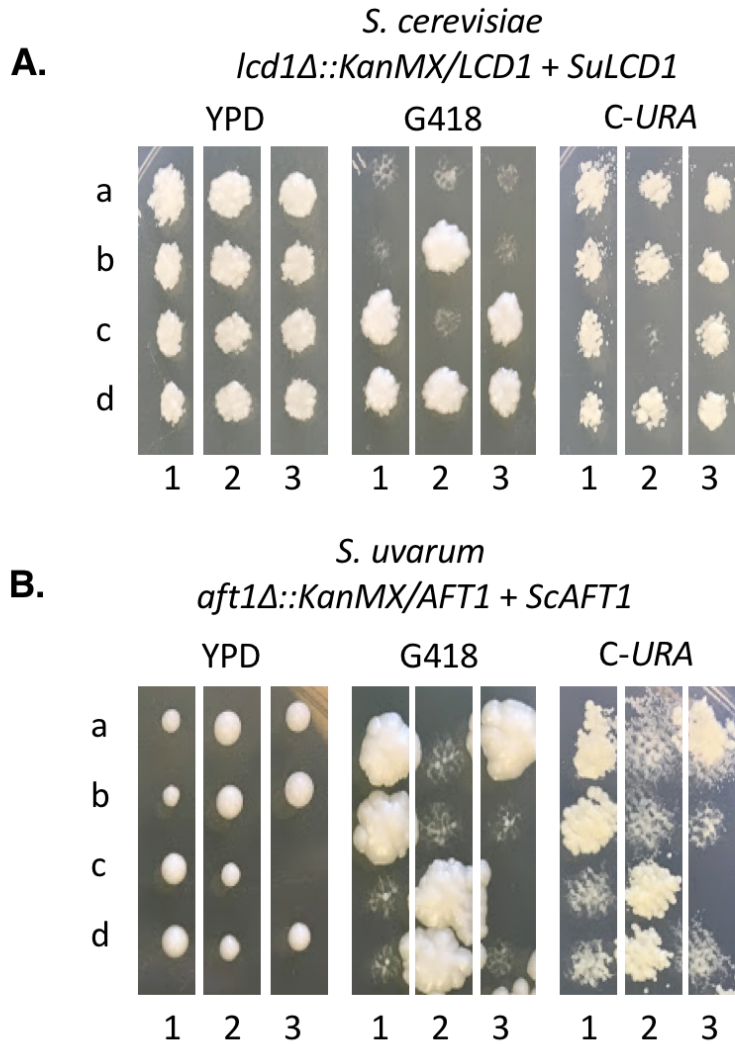

1

2 **Figure 6. Complementation assay confirming two examples of genes that differ in essentiality**

3 **but complement the viability phenotype in both genetic backgrounds.** Letters a-d represent

4 four spores, while numbers 1-3 indicate three tetrads. Tetrads were dissected on YPD and were

5 replica plated to G418 to indicate which spore contains the deletion and C-URA to indicate the

6 presence of the plasmid expressing the indicated gene. **A)** *S. cerevisiae* *lcd1Δ::KanMX* strain

7 containing a plasmid with the *S. uvarum* allele of *LCD1*. **B)** *S. uvarum* *aft1Δ::KanMX* strain

8 containing a plasmid with the *S. cerevisiae* allele of *AFT1*.

## 1 Discussion

2 In this study, we applied a comparative functional genomics approach to investigate  
3 how genetic background influences gene dispensability between the reference strains of two  
4 diverged species of yeast. Using insertional integration comparisons between haploid and  
5 diploid pools of mutants, we prioritized genes to validate as predicted essential, non-essential,  
6 and differentially essential gene categories in *S. uvarum*. We predicted approximately 12% of  
7 orthologs to differ in dispensability between *S. uvarum* and *S. cerevisiae* and validated 22 genes  
8 in this category. Surprisingly, however, most genes that differ in dispensability have retained  
9 their function between these two species, suggesting that differences in gene dispensability are  
10 likely due to *trans*-acting changes rather than the direct result of divergent coding sequence.

11 Specifically, our comparison of orthologous genes between *S. cerevisiae* and *S. uvarum*  
12 revealed that a majority of genes maintain conserved dispensability requirements (88%) while  
13 12% of orthologs are predicted to be essential in one species but not the other. We confirmed  
14 93% (15/16) of predicted conserved categories of essentiality and 49% (27/55) of genes  
15 predicted to be differentially essential. While applying a less restrictive insertion ratio cut-off  
16 value includes more genes to be characterized in this category, it also increases the likelihood  
17 of false positives and creates a challenge for the correct validation of this category type.  
18 Although our rate of confirmed genes in this category was lower than the conserved category,  
19 we correctly identified a subset of genes that are differentially dispensable, despite the  
20 moderately dense insertional profile of the library and a less restrictive cut-off value applied to  
21 include more genes to be classified as this type. Further analysis of predicted species-specific  
22 essential genes revealed enriched GO ontology terms of molecular functions involved in

1 structural constituent of the ribosome and DNA binding, although more precise analysis of  
2 functional enrichments may require more thorough validation to remove the influence of false  
3 positives. Finally, we utilized yeast genetic tools to test hypotheses about genetic background  
4 effects that contribute to differences in essentiality. We find that differences can be explained  
5 by paralog divergence and *trans*-acting factors.

6         Applying a random insertional approach has proved to be useful in functionally profiling  
7 *S. uvarum* and will be useful for studying other understudied species, with the goal of adding  
8 information to gene annotation methods. While this study was performed in standard rich  
9 media laboratory conditions, it is easily amenable for testing stressful conditions, other nutrient  
10 sources, as well as naturally relevant conditions. This library can be applied to probe previously  
11 un-annotated genes or even proto-genes for functional acquisition, since it is not restricted to *a*  
12 *priori* assumptions of genic boundaries. The identification of synthetic lethal interactions can  
13 also be determined by performing insertional profiling in the background of a particular  
14 mutation of interest relatively quickly and economically. Similarly, the library could be  
15 generated in different strain backgrounds to confirm which phenotypes are truly species-  
16 specific versus which might vary within the species. Additionally, pooled competition  
17 experiments *en masse* can be used to determine the frequency of particular insertional  
18 mutants, providing quantitative measurements of cellular fitness across conditions. Such a  
19 strategy could be efficiently employed using computational approaches to prioritize  
20 experimental conditions that are most likely to probe the most valuable phenotypic  
21 information for further functional characterization (Guan et al. 2010).

1           Gene regulation also plays a large role in evolution and is crucial for responding to  
2 environmental change (Carroll 2005). In previous studies, we aimed to experimentally  
3 characterize differences in gene expression patterns between *S. cerevisiae* and *S. uvarum* and  
4 discovered species-specific responses to osmotic stress, peroxisome biogenesis and autophagy,  
5 suggesting that each species may have been exposed to different selective pressures within  
6 their respective evolutionary histories (Caudy et al. 2013; Guan et al. 2013). Interestingly, we  
7 did not find that genes with different gene expression patterns between species were more  
8 likely to be differentially essential. Instead, *trans* genetic interactions dominate. Identifying the  
9 molecular basis of these *trans* effects can now be undertaken, potentially revealing principles of  
10 genetic interactions across species.

11

## 1 **Materials and Methods**

2

### 3 **Strains, plasmids, and primers**

4           The strains, plasmids, and primers used in this study are listed in **Supplemental Files 1, 2**  
5 and **3** respectively. All *S. uvarum* strains are derivatives of the sequenced strain CBS 7001  
6 (previously sometimes called *S. bayanus* or *S. bayanus var uvarum*), and all *S. cerevisiae* strains  
7 are of S288C background. Unless specified below, yeast strains were grown at 25°C for *S.*  
8 *uvarum* strains and 30°C for *S. cerevisiae* strains in media prepared according to standard  
9 recipes.

10

### 11 **Construction of the Tn7 mutagenesis library**

12           The construction of the Tn7 plasmid library has been previously described in detail and  
13 was obtained from the Caudy lab (Caudy et al. 2013). Briefly, this mutagenesis approach uses a  
14 plasmid library of *S. uvarum* genomic DNA, containing random Tn7 transposon insertions. The  
15 construct has a selectable marker for transformation into yeast, allowing the selection of  
16 disruption alleles.

17           To make the plasmid library, genomic DNA was isolated and fragmented by sonication  
18 to an average length of 3 kb from a  $\rho^0$  *S. uvarum* strain. The ends of the DNA were blunted and  
19 cloned into the pZero Blunt vector (Invitrogen). Approximately 50,000 colonies were recovered  
20 from the transformation into *E. coli* DH5 $\alpha$  strain. The transformants were scraped from  
21 Kanamycin plates and pooled for plasmid purification. A version of the Tn7 transposon was  
22 constructed by amplifying the promoter from the Tet-on pCM224 (Bellí et al. 1998). The

1 cassette of the Tet-on promoter and the ClonNAT resistance gene was amplified using PCR  
2 primers containing *lox* and BamHI sites and cloned into the BamHI site of the NEB vector pGPS3.  
3 This transposon construct was inserted into the *S. uvarum* genomic DNA library *in vitro* using  
4 the transposon kit from NEB. Initial selection (50,000 colonies) was on ClonNAT/Zeo. HindIII  
5 and XbaI were used to digest the pZero backbone to release the linearized genomic DNA for  
6 efficient recombination. The library was then used to transform a haploid *S. uvarum* strain  
7 (ACY12) and a diploid strain (YMD1228) using a modified transformation protocol optimized for  
8 *S. uvarum* (Caudy et al. 2013). Transformant colonies were plated to YPD-ClonNat plates and  
9 allowed to grow for 5 days at 25°C. A total of ~ 500,000 colonies were scraped for each pool.  
10 Each final pool was well mixed at a 1:1 ratio with 50% glycerol and 2 ml aliquots were stored at  
11 -80°C.

12

### 13 **Pooled growth of Tn7 *S. uvarum* libraries**

14 To determine the initial complexity of the integrated pools, genomic DNA was extracted  
15 directly from the glycerol stocks of both haploid and diploid pools using the Hoffman and  
16 Winston method (Hoffman and Winston 1987). Additionally, we inoculated 500 µl of both  
17 libraries in separate YPD flasks for 24 hours to recover mutants after 24 hours of growth.  
18 Furthermore, to collect samples over time, we competed both pools under sulfate-limiting  
19 conditions in chemostats for approximately 30 generations at 25°C. A large-volume, ~300ml,  
20 sulfate-limited chemostat (Gresham et al. 2008) was inoculated with a single 2ml glycerol stock  
21 sample of each pool. After allowing the chemostat to grow at 25°C without dilution for ~24 hrs,  
22 fresh media was added to the chemostat at a rate of 0.17 h<sup>-1</sup>. This pooled growth assay was

1 repeated twice, each including 5 time points with O.D. and dilution rate measurements as well  
2 as collected cell pellets for DNA extractions using the modified Hoffman-Winston prep  
3 referenced above. Early time-points from this pooled growth assay were included in our  
4 analysis here because we found it to be largely overlapping with the rich media collection, and  
5 we found that the additional sequencing coverage improved our overall results.

6

### 7 **Tn7 sequencing library preparation**

8 Sequencing libraries were prepared by first extracting genomic DNA from pools of each  
9 library grown in YPD and sulfate limited conditions. Genomic DNA libraries were prepared for  
10 Illumina sequencing using a Tn7-seq protocol described previously (Wetmore et al. 2015).  
11 Briefly, the Covaris was used to randomly fragment DNA to approximately 200-800 bp in length.  
12 The fragments were blunt ended and A-tails were added to the fragments to ligate the Illumina  
13 adapter sequences. Custom index primers (listed in **Supplemental File 3**) targeting Tn7-specific  
14 sequence and Illumina adapter sequence were used to enrich for genomic DNA with Tn7  
15 insertion sites. The barcoded libraries were quantified on an Invitrogen Qubit Fluorometer and  
16 submitted for 150 bp-paired end sequencing on an Illumina HiSeq 2000 by JGI. This method  
17 was also applied to make the plasmid library, from linearized plasmid DNA.

18

### 19 **Sequencing analysis**

20 Sequencing reads from the FASTQ files were trimmed to remove Tn7 specific sequences  
21 and adapter sequences, restricting the minimal length of reads to 36 bp using Trimmomatic  
22 (Bolger et al. 2014) and FASTX-Toolkit. Trimmed FASTQ files were aligned against the reference



1 strain of *S. uvarum* (CBS 7001) using Burrows-Wheeler Aligner (BWA) with standard filters  
2 applied (Li and Durbin 2009). Specifically, non-uniquely mapping reads, reads in which the pair  
3 did not map, reads with a mapping quality less than 30 and PCR/optical duplicate reads were  
4 filtered out; the samtools C-50 filter was applied as recommended for reads mapped with BWA.  
5 To limit the insertional analysis to actively growing cells, SAM files were merged from the later  
6 time points in the growth assays of each pool using samtools (Li et al. 2009). The sequence  
7 coverage of the nuclear genome ranged from 70 to 300x (**Supplemental File 4**). Insertion sites  
8 were determined from SAM files using a custom Ruby script. Insertion sites that had 10 reads  
9 or more were processed through a custom Python script that counted the number of insertion  
10 events in each coding region across the genome. This pipeline was applied to both libraries and  
11 further comparisons were made between the pools to determine essential genes. Read data  
12 have been deposited at the NCBI under the SRA accession number SRP115313.

13

#### 14 **Predicting gene dispensability between species**

15 In order to determine a list of predicted essential genes, comparisons were made  
16 between the haploid and diploid libraries. We calculated an insertion ratio by dividing the  
17 number of insertions in the haploid pool by the number in the diploid pool. This direct  
18 comparison inherently accounts for the length of the gene, since the length is constant in both  
19 libraries. Therefore, a decrease in insertion sites in the haploid library indicates a reduction in  
20 the presence of mutants containing insertional sites that impact cellular viability. Ratios closer  
21 to zero represent insertional mutants that reduce the frequency of haploids harboring  
22 insertional sites in a coding region that is required for cellular growth.

1           To make an insertion ratio cut-off value to categorize essential and non-essential genes,  
2 we analyzed the distribution of insertion ratios within intergenic regions between  
3 500 bp and 7 kb in length and positioned between Watson and Crick coding regions (so chosen  
4 because these are less likely to contain promoter sequences). The distribution of the insertion  
5 ratio calculated for these regions was similar to that of known non-essential genes in *S.*  
6 *cerevisiae*. Therefore, we used this distribution to rank the insertion ratios of all coding regions  
7 and set a cut-off value to 0.25 where 20% of the insertion ratio of coding regions fell below the  
8 intergenic distribution, which was similar to the kernel density estimates of known *S. cerevisiae*  
9 essential genes. The kernel density estimates were computed in R and visualized using ggplot2.  
10 To remove a class of low coverage genes in the essential gene category, we applied an  
11 additional cut-off value. Since the difference between 0 and 1 with a gene that is longer has a  
12 lower weighted difference than a shorter gene, we calculated the difference between the  
13 diploid pool and haploid pool and normalized this value to the length of the gene (normalized  
14 difference). Genes with less than a normalized difference of 2 were removed from the essential  
15 category.

16

### 17 **Validating predicted essential and non-essential genes**

18           We validated predicted essential genes by creating *S. uvarum* heterozygous diploid  
19 deletion mutants using primers listed in the **Supplemental File 3**. Primers containing 50 bp of  
20 homology upstream and downstream of each candidate open reading frame were used to  
21 amplify the KanMX cassette from the pRS400 plasmid. The PCR product was used to integrate  
22 into the *S. uvarum* genome using an *S. uvarum* specific transformation protocol. The proper

1 integration of the construct was validated through clone purifying positive colonies and  
2 extracting genomic DNA to perform PCR using diagnostic primers listed in the **Supplemental**  
3 **File 3**. The diagnostic primers were designed to target ~150 bp upstream and ~150 bp  
4 downstream of the open reading frame to identify wild-type and drug-marker alleles. Positive  
5 clones were sporulated for 3-5 days at 25°C and 8 tetrads were screened for 2:2 viable  
6 segregation. Images were taken after 4 days of growth on YPD plates. Mutants conferring non-  
7 essential phenotypes were replicated on G418 plates and images were taken after 4 days of  
8 growth at 25°C (**Supplemental Fig. 9&10**). This method was also applied to making double  
9 mutants. A collection of 440 *MAT $\alpha$*  *S. uvarum* strains was generated by standard methods in  
10 the Rine lab and used as confirmed non-essential genes.

11

## 12 **Cross-species complementation assays**

13 To determine if genes are diverging in gene function or in other *trans*-acting factors, we  
14 performed cross-species complementation assays with species-specific essential genes.  
15 Essential genes that were *S. cerevisiae* specific were tested in a heterozygous diploid deletion  
16 strain from the SGA marker collection. Alleles of each *S. cerevisiae* essential gene and their  
17 promoters were amplified from *S. cerevisiae* and *S. uvarum* genomes and cloned into a CEN ARS  
18 plasmid. PCR using Phusion DNA polymerase was used to amplify 500 bp upstream and 5 bp  
19 downstream of the stop codon of each gene from *S. cerevisiae* and *S. uvarum*. Each gene was  
20 cloned into pIL37 by Gibson assembly using primers listed in **Supplemental File 3** using  
21 standard methods (Thomas et al. 2015). All plasmids used in this study are listed in  
22 **Supplemental File 2**. The *S. cerevisiae* heterozygous diploid deletion strains were transformed

1 with a plasmid containing a corresponding allele from each species and selected on C-URA  
2 plates. Similarly, *S. uvarum* specific essential genes were also tested by making each  
3 heterozygous diploid deletion strain *ura3Δ/ura3Δ*, and transformed with a plasmid containing a  
4 corresponding *S. cerevisiae* allele from the MoBY-ORF collection (Ho et al. 2009).

5 Transformed strains were sporulated for 5 days at 30°C and 25°C for *S. cerevisiae* and *S.*  
6 *uvarum* species, respectively, and tetrad analysis was performed on YPD plates. After 3 days of  
7 growth, plates were replica plated on C-URA and YPD+G418 plates and imaged after 2 days of  
8 growth (**Supplemental Fig. 15**).

9

#### 10 **Data Access**

11 The transposon insertion data in this study have been submitted to the NCBI Sequence Read  
12 Archive (SRA; <https://www.ncbi.nlm.nih.gov/sra/>) under SRA accession number  
13 SRP115313.

14

15

## 1 **Acknowledgments**

2           Thank you to Jasper Rine for generously sharing *S. uvarum* deletion strains. Thank you  
3 to Noah Hanson and Kolena Dang for technical assistance with tetrad dissections. Thank you to  
4 Daniel Chee for his help with optimizing the Python code and Jeremy Stone for his help with the  
5 Ruby script that was used for the insertional analysis pipeline. We thank M.K. Raghuraman and  
6 Harmit Malik for their helpful comments on the manuscript and thank Sergey Kryazhimskiy for  
7 his helpful insight about data analysis. This work was supported by NSF grant 1516330. MS  
8 was funded by NSF GSRF DGE-1256082 and the Robert D. Watkins Graduate Research  
9 Fellowship from the American Society for Microbiology. MJD is supported in part by a Faculty  
10 Scholars grant from the Howard Hughes Medical Institute. MJD is also a senior fellow in the  
11 Genetic Networks program at the Canadian Institute for Advanced Research. Sequencing  
12 resources were provided by JGI CSP Project 1460. AAC was supported by an Open Operating  
13 Grant from the Canadian Institutes for Health Research and by a Discovery Grant from the  
14 Natural Sciences and Engineering Research Council of Canada. AAC is the Canada Research  
15 Chair of Metabolomics for Enzyme Discovery.

16

## 17 **Author contributions**

18           **Conceptualization:** MRS CP AC MJD.

19           **Formal analysis:** MRS MJD.

20           **Funding acquisition:** AC MJD APA RB.

21           **Investigation:** MRS CP FC BH MJD.

22           **Project administration:** MRS CP FC BH MJD.

1      **Resources:** JMS RB APA AC.

2      **Supervision:** MJD.

3      **Visualization:** MRS.

4      **Writing – original draft:** MRS MJD.

5

6      **Competing financial interests**

7      The authors declare no competing financial interests.

8

## 1 References

- 2 Baba T, Ara T, Hasegawa M, Takai Y, Okumura Y, Baba M, Datsenko KA, Tomita M, Wanner BL,  
3 Mori H. 2006. Construction of *Escherichia coli* K-12 in-frame, single-gene knockout  
4 mutants: the Keio collection. *Mol Syst Biol* **2**: 2006.0008.
- 5 Bellí G, Garí E, Piedrafita L, Aldea M, Herrero E. 1998. An activator/repressor dual system allows  
6 tight tetracycline-regulated gene expression in budding yeast. *Nucleic Acids Res* **26**: 942–  
7 947.
- 8 Berardinis V de, Vallenet D, Castelli V, Besnard M, Pinet A, Cruaud C, Samair S, Lechaplais C,  
9 Gyapay G, Richez C, et al. 2008. A complete collection of single-gene deletion mutants of  
10 *Acinetobacter baylyi* ADP1. *Mol Syst Biol* **4**: 174.
- 11 Bolger AM, Lohse M, Usadel B. 2014. Trimmomatic: a flexible trimmer for Illumina sequence  
12 data. *Bioinformatics* **30**: 2114–2120.
- 13 Carroll SB. 2005. Evolution at Two Levels: On Genes and Form. *PLOS Biol* **3**: e245.
- 14 Caudy AA, Guan Y, Jia Y, Hansen C, DeSevo C, Hayes AP, Agee J, Alvarez-Dominguez JR, Arellano  
15 H, Barrett D, et al. 2013. A New System for Comparative Functional Genomics of  
16 *Saccharomyces* Yeasts. *Genetics* **195**: 275–287.
- 17 Coradetti ST, Pinel D, Geiselman GM, Ito M, Mondo SJ, Reilly MC, Cheng Y-F, Bauer S, Grigoriev  
18 IV, Gladden JM, et al. 2018. Functional genomics of lipid metabolism in the oleaginous  
19 yeast *Rhodospiridium toruloides*. *eLife*. **7**: e32110.
- 20 Costanzo M. 2016. Systems biology: A yeast global genetic interaction map. *Nat Methods* **13**:  
21 904–904.
- 22 de la Rosa J, Weber J, Friedrich MJ, Li Y, Rad L, Ponstingl H, Liang Q, de Quirós SB, Noorani I,  
23 Metzakopian E, et al. 2017. A single-copy Sleeping Beauty transposon mutagenesis  
24 screen identifies new *PTEN*-cooperating tumor suppressor genes. *Nat Genet* **49**: 730–  
25 741.
- 26 DeNicola GM, Karreth FA, Adams DJ, Wong CC. 2015. The utility of transposon mutagenesis for  
27 cancer studies in the era of genome editing. *Genome Biol* **16**:229.
- 28 Dowell RD, Ryan O, Jansen A, Cheung D, Agarwala S, Danford T, Bernstein DA, Rolfe PA, Heisler  
29 LE, Chin B, et al. 2010. Genotype to phenotype: a complex problem. *Science* **328**: 469.
- 30 Dujon B. 2010. Yeast evolutionary genomics. *Nat Rev Genet* **11**: 512–524.
- 31 Eisen JA. 1998. Phylogenomics: Improving Functional Predictions for Uncharacterized Genes by  
32 Evolutionary Analysis. *Genome Res* **8**: 163–167.

- 1 Folch-Mallol JL, Martínez LM, Casas SJ, Yang R, Martínez-Anaya C, López L, Hernández A, Nieto-  
2 Sotelo J. 2004. New roles for *CDC25* in growth control, galactose regulation and cellular  
3 differentiation in *Saccharomyces cerevisiae*. *Microbiology* **150**: 2865–2879.
- 4 Gangadharan S, Mularoni L, Fain-Thornton J, Wheelan SJ, Craig NL. 2010. DNA transposon  
5 Hermes inserts into DNA in nucleosome-free regions *in vivo*. *Proc Natl Acad Sci* **107**:  
6 21966–21972.
- 7 Gresham D, Desai MM, Tucker CM, Jenq HT, Pai DA, Ward A, DeSevo CG, Botstein D, Dunham  
8 MJ. 2008. The Repertoire and Dynamics of Evolutionary Adaptations to Controlled  
9 Nutrient-Limited Environments in Yeast. *PLoS Genet* **4**: e1000303.
- 10 Guan Y, Dunham M, Caudy A, Troyanskaya O. 2010. Systematic Planning of Genome-Scale  
11 Experiments in Poorly Studied Species. *PLOS Comput Biol* **6**: e1000698.
- 12 Guan Y, Dunham MJ, Troyanskaya OG, Caudy AA. 2013. Comparative gene expression between  
13 two yeast species. *BMC Genomics* **14**: 1–13.
- 14 Guo Y, Park JM, Cui B, Humes E, Gangadharan S, Hung S, FitzGerald PC, Hoe K-L, Grewal SIS,  
15 Craig NL, et al. 2013a. Integration Profiling of Gene Function With Dense Maps of  
16 Transposon Integration. *Genetics* **195**: 599–609.
- 17 Guo Y, Sheng Q, Li J, Ye F, Samuels DC, Shyr Y. 2013b. Large Scale Comparison of Gene  
18 Expression Levels by Microarrays and RNAseq Using TCGA Data. *PLOS ONE* **8**: e71462.
- 19 Ho CH, Magtanong L, Barker SL, Gresham D, Nishimura S, Natarajan P, Koh JLY, Porter J, Gray  
20 CA, Andersen RJ, et al. 2009. A molecular barcoded yeast ORF library enables mode-of-  
21 action analysis of bioactive compounds. *Nat Biotechnol* **4**:369-77
- 22 Hoffman CS, Winston F. 1987. A ten-minute DNA preparation from yeast efficiently releases  
23 autonomous plasmids for transformation of *Escherichia coli*. *Gene* **57**: 267–272.
- 24 Kellis M, Patterson N, Endrizzi M, Birren B, Lander ES. 2003. Sequencing and comparison of  
25 yeast species to identify genes and regulatory elements. *Nature* **423**: 241–254.
- 26 Kim D-U, Hayles J, Kim D, Wood V, Park H-O, Won M, Yoo H-S, Duhig T, Nam M, Palmer G, et al.  
27 2010. Analysis of a genome-wide set of gene deletions in the fission yeast  
28 *Schizosaccharomyces pombe*. *Nat Biotechnol* **28**: 617–623.
- 29 Li H, Durbin R. 2009. Fast and accurate short read alignment with Burrows–Wheeler transform.  
30 *Bioinformatics* **25**: 1754–1760.
- 31 Li H, Handsaker B, Wysoker A, Fennell T, Ruan J, Homer N, Marth G, Abecasis G, Durbin R. 2009.  
32 The Sequence Alignment/Map format and SAMtools. *Bioinformatics* **25**: 2078–2079.



- 1 Michel AH, Hatakeyama R, Kimmig P, Arter M, Peter M, Matos J, Virgilio CD, Kornmann B. 2017.  
2 Functional mapping of yeast genomes by saturated transposition. *eLife* **6**: e23570.
- 3 Oh J, Fung E, Schlecht U, Davis RW, Giaever G, St. Onge RP, Deutschbauer A, Nislow C. 2010.  
4 Gene Annotation and Drug Target Discovery in *Candida albicans* with a Tagged  
5 Transposon Mutant Collection. *PLoS Pathog* **6(10)**: e1001140.
- 6 Porwollik S, Santiviago CA, Cheng P, Long F, Desai P, Fredlund J, Srikumar S, Silva CA, Chu W,  
7 Chen X, et al. 2014. Defined Single-Gene and Multi-Gene Deletion Mutant Collections in  
8 *Salmonella enterica* sv *Typhimurium*. *PLOS ONE* **9**: e99820.
- 9 Price MN, Wetmore KM, Waters RJ, Callaghan M, Ray J, Liu H, Kuehl JV, Melnyk RA, Lamson JS,  
10 Suh Y, et al. 2018. Mutant phenotypes for thousands of bacterial genes of unknown  
11 function. *Nature* **557**: 503–509.
- 12 Ross-Macdonald P, Coelho PSR, Roemer T, Agarwal S, Kumar A, Jansen R, Cheung K-H, Sheehan  
13 A, Symoniatis D, Umansky L, et al. 1999. Large-scale analysis of the yeast genome by  
14 transposon tagging and gene disruption. *Nature* **402**: 413–418.
- 15 Sadhu MJ, Bloom JS, Day L, Siegel JJ, Kosuri S, Kruglyak L. 2018. Highly parallel genome variant  
16 engineering with CRISPR–Cas9. *Nat Genet* **50**: 510–514.
- 17 Scannell DR, Butler G, Wolfe KH. 2007. Yeast genome evolution—the origin of the species. *Yeast*  
18 **24**: 929–942.
- 19 Schwarzmüller T, Ma B, Hiller E, Istel F, Tscherner M, Brunke S, Ames L, Firon A, Green B, Cabral  
20 V, et al. 2014. Systematic Phenotyping of a Large-Scale *Candida glabrata* Deletion  
21 Collection Reveals Novel Antifungal Tolerance Genes. *PLOS Pathog* **10**: e1004211.
- 22 Thomas S, Maynard ND, Gill J. 2015. DNA library construction using Gibson Assembly®. *Nat*  
23 *Methods* **12**:1098.
- 24 Tong AH, Evangelista M, Parsons AB, Xu H, Bader GD, Pagé N, Robinson M, Raghbizadeh S,  
25 Hogue CW, Bussey H, et al. 2001. Systematic genetic analysis with ordered arrays of  
26 yeast deletion mutants. *Science* **294**: 2364–2368.
- 27 Usadel B, Obayashi T, Mutwil M, Giorgi FM, Bassel GW, Tanimoto M, Chow A, Steinhauser D,  
28 Persson S, Provar NJ. 2009. Co-expression tools for plant biology: opportunities for  
29 hypothesis generation and caveats. *Plant Cell Environ* **32**: 1633–1651.
- 30 van Opijnen T, Camilli A. 2013. Transposon insertion sequencing: a new tool for systems-level  
31 analysis of microorganisms. *Nat Rev Microbiol* **11**: 435–442.
- 32 Weerdenburg EM, Abdallah AM, Rangkuti F, Ghany MAE, Otto TD, Adroub SA, Molenaar D,  
33 Ummels R, Veen K ter, Stempvoort G van, et al. 2015. Genome-Wide Transposon  
34 Mutagenesis Indicates that *Mycobacterium marinum* Customizes Its Virulence

1 Mechanisms for Survival and Replication in Different Hosts. *Infect Immun* **83**: 1778–  
2 1788.

3 Wetmore KM, Price MN, Waters RJ, Lamson JS, He J, Hoover CA, Blow MJ, Bristow J, Butland G,  
4 Arkin AP, et al. 2015. Rapid Quantification of Mutant Fitness in Diverse Bacteria by  
5 Sequencing Randomly Bar-Coded Transposons. *mBio* **6**: e00306-15.

6 Winzeler EA, Shoemaker DD, Astromoff A, Liang H, Anderson K, Andre B, Bangham R, Benito R,  
7 Boeke JD, Bussey H, et al. 1999. Functional characterization of the *S. cerevisiae* genome  
8 by gene deletion and parallel analysis. *Science* **285**: 901–906.

9 Yung MC, Park DM, Overton KW, Blow MJ, Hoover CA, Smit J, Murray SR, Ricci DP, Christen B,  
10 Bowman GR, et al. 2015. Transposon Mutagenesis Paired with Deep Sequencing of  
11 *Caulobacter crescentus* under Uranium Stress Reveals Genes Essential for Detoxification  
12 and Stress Tolerance. *J Bacteriol* **197**: 3160–3172.

13 Zhao L, Anderson MT, Wu W, T. Mobley HL, Bachman MA. 2017. TnseqDiff: identification of  
14 conditionally essential genes in transposon sequencing studies. *BMC Bioinformatics* **18**:  
15 326.

16 Zhu J, Gong R, Zhu Q, He Q, Xu N, Xu Y, Cai M, Zhou X, Zhang Y, Zhou M. 2018. Genome-Wide  
17 Determination of Gene Essentiality by Transposon Insertion Sequencing in Yeast *Pichia*  
18 *pastoris*. *Sci Rep* **8**: 10223.

19
